# Supplementary material for: Receptor Activation of HIV-1 Env Leads to Asymmetric Exposure of the gp41 Trimer
Source: PubMed Central journal article supplement (PMC5222517; doi:10.1371/journal.ppat.1006098), 2016-12-19

**A**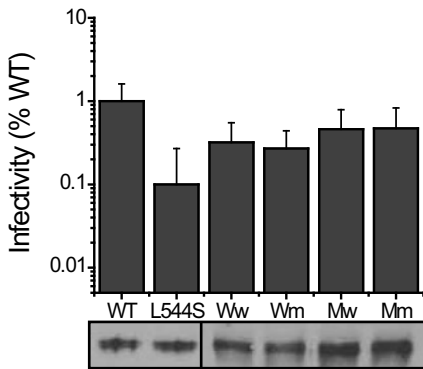

See Fig 4A for T20 titrations  
of Env Heterotrimers

1:1 Expression Ratio (A:B)  
A<sub>2</sub>B and AB<sub>2</sub> Trimers

**B**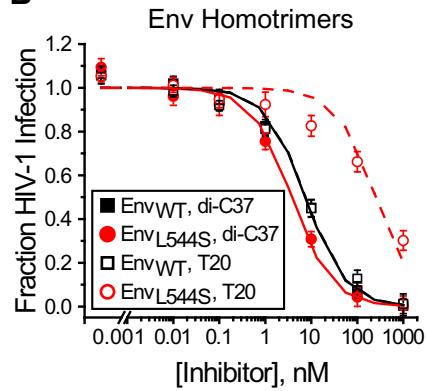**C**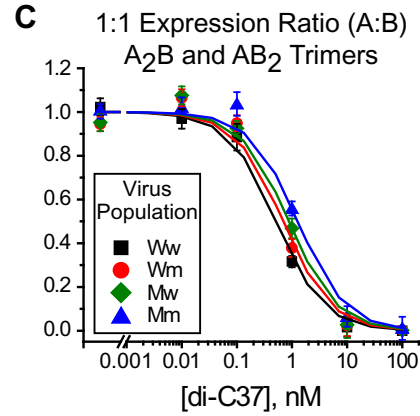**D**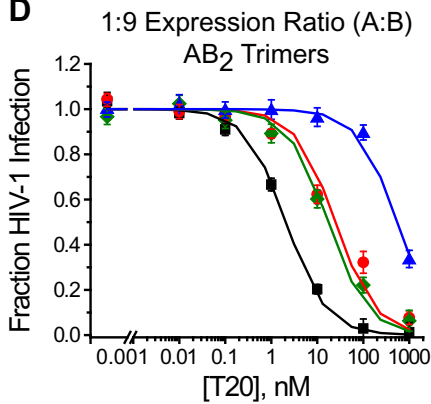**E**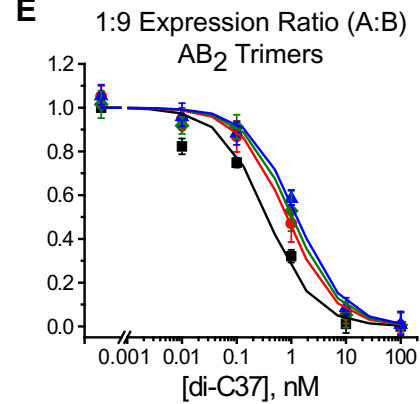**F**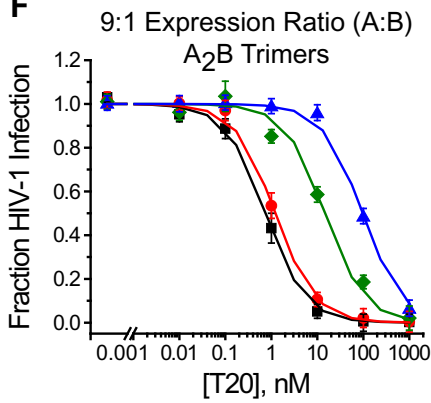**G**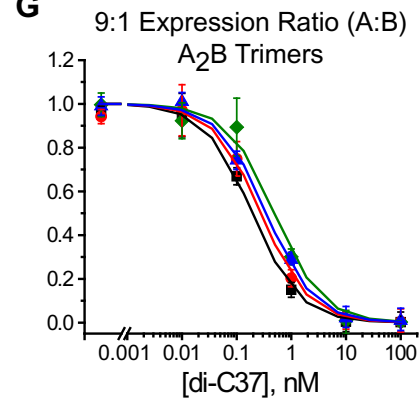

Supplement: ppat.1006098.s001.pdf [file ppat.1006098.s001.pdf]
