# Supplementary material for: Receptor Activation of HIV-1 Env Leads to Asymmetric Exposure of the gp41 Trimer
Source: PubMed Central journal article supplement (PMC5222517; doi:10.1371/journal.ppat.1006098), 2016-12-19

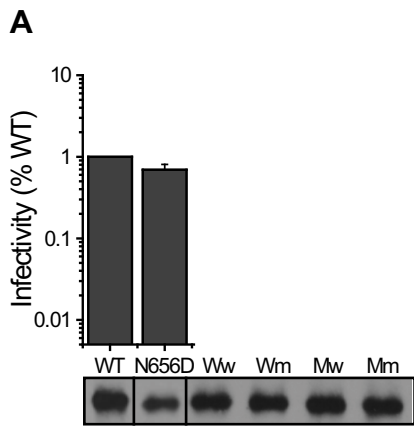

See Fig 5A for 5H<sub>LAVA</sub> titrations of Env Heterotrimers

1:1 Env Expression Ratio  
A<sub>2</sub>B and AB<sub>2</sub> Trimers

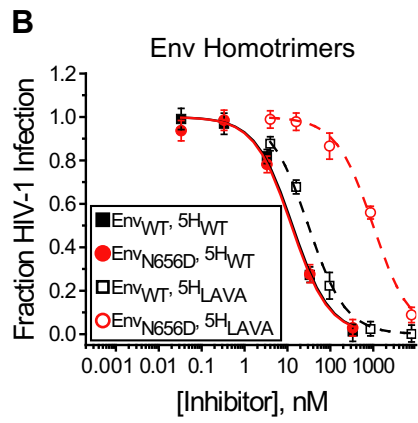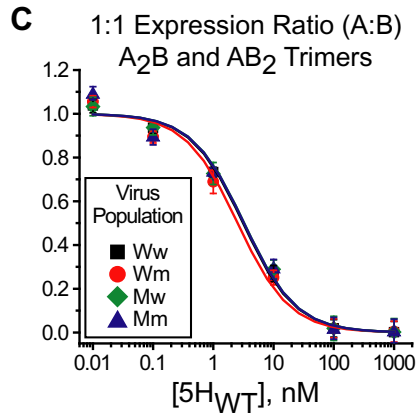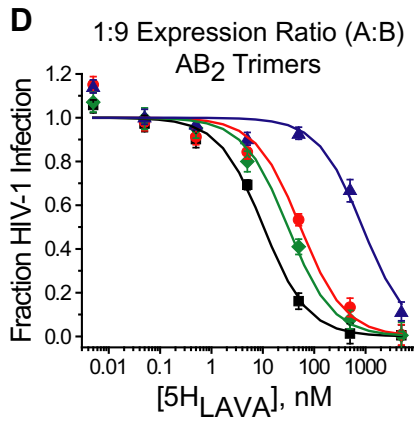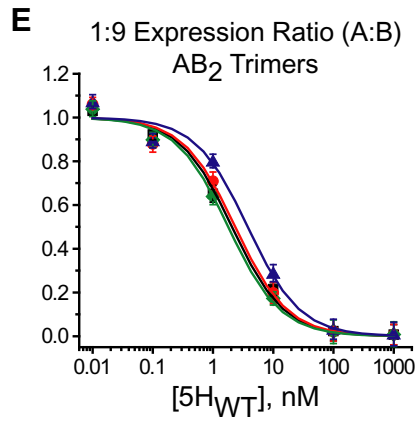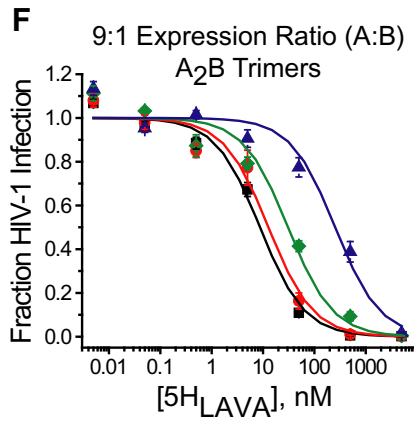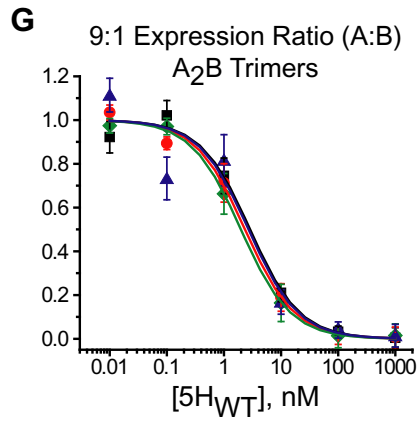

Supplement: ppat.1006098.s003.pdf [file ppat.1006098.s003.pdf]
