# Supplementary material for: Receptor Activation of HIV-1 Env Leads to Asymmetric Exposure of the gp41 Trimer
Source: PubMed Central journal article supplement (PMC5222517; doi:10.1371/journal.ppat.1006098), 2016-12-19

**A**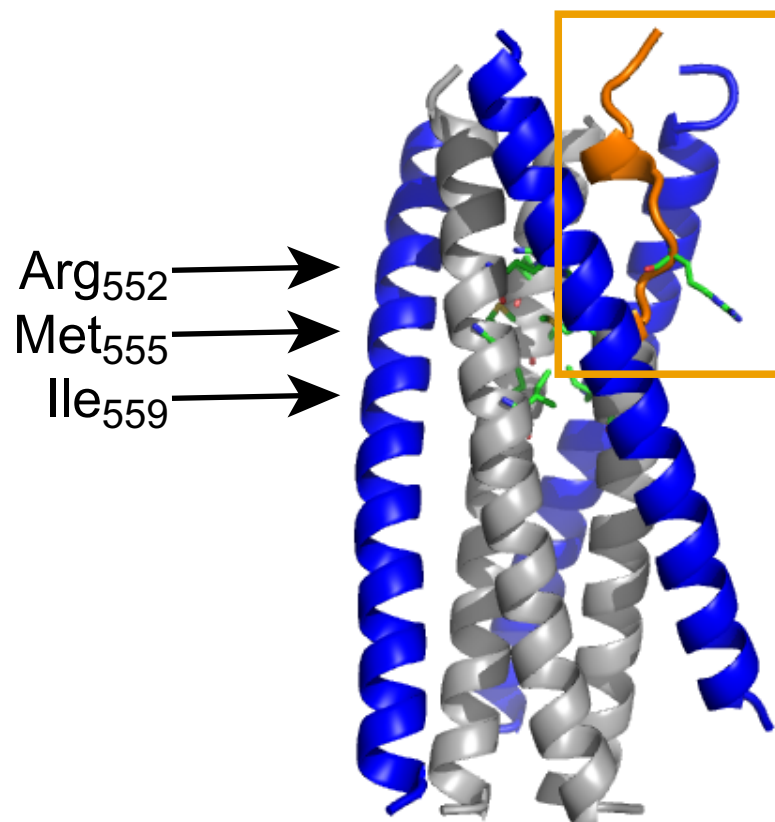**E**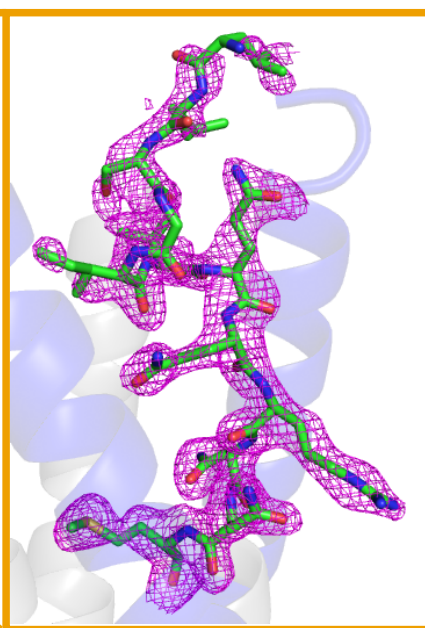**B**Arg<sub>552</sub>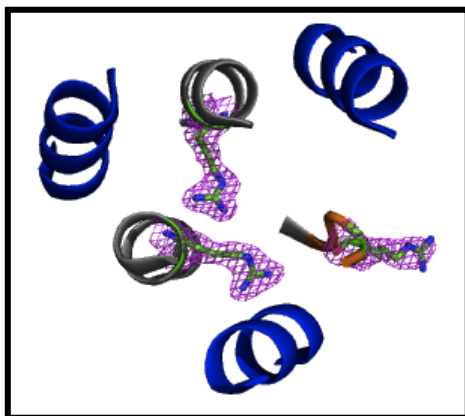**C**Met<sub>555</sub>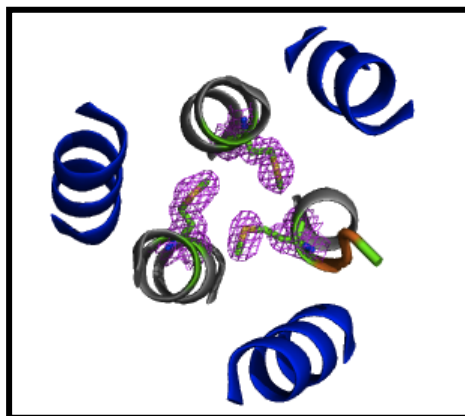**D**Ile<sub>559</sub>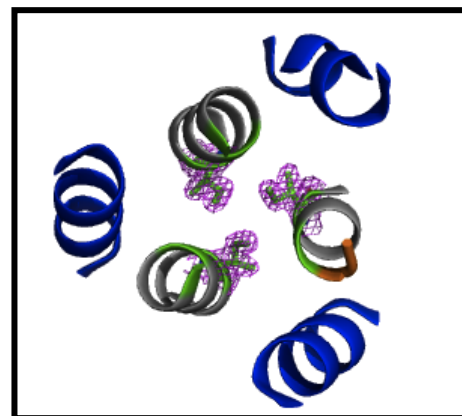

Supplement: ppat.1006098.s004.pdf [file ppat.1006098.s004.pdf]
