# Supplementary material for: Receptor Activation of HIV-1 Env Leads to Asymmetric Exposure of the gp41 Trimer
Source: PubMed Central journal article supplement (PMC5222517; doi:10.1371/journal.ppat.1006098), 2016-12-19

A

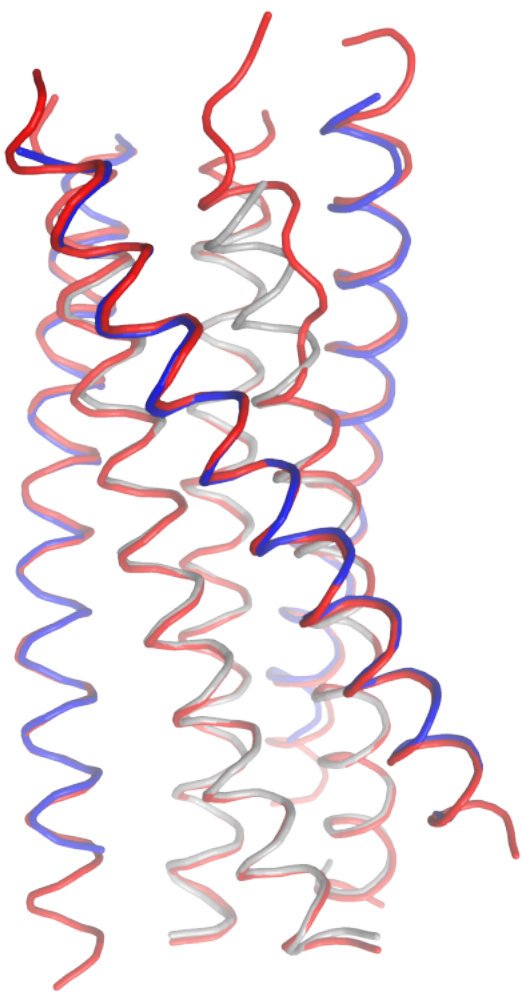

B

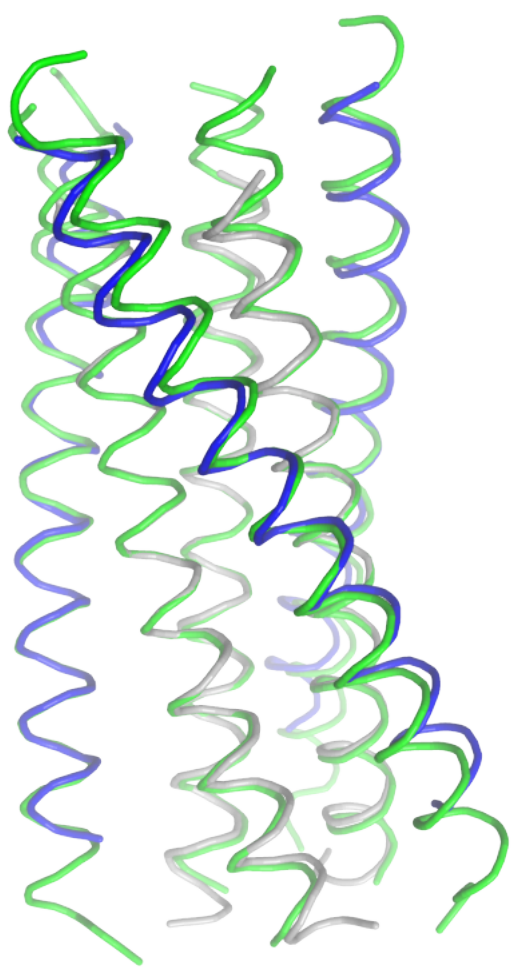

Supplement: ppat.1006098.s006.pdf [file ppat.1006098.s006.pdf]
