# Supplementary material for: Receptor Activation of HIV-1 Env Leads to Asymmetric Exposure of the gp41 Trimer
Source: PubMed Central journal article supplement (PMC5222517; doi:10.1371/journal.ppat.1006098), 2016-12-19

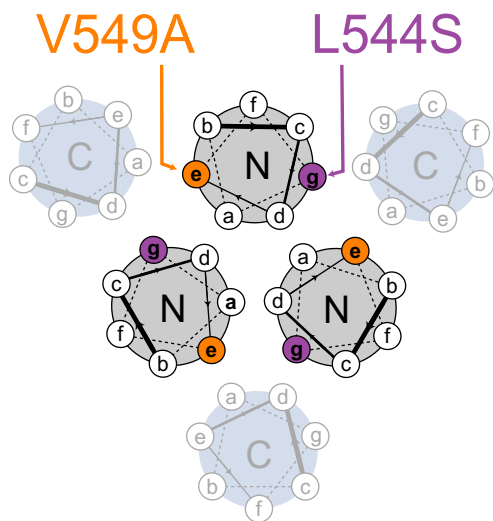

1 CD4 Bound

No Sites Exposed

2 CD4 Bound

1 Site Exposed

2 Sites Exposed

L544S

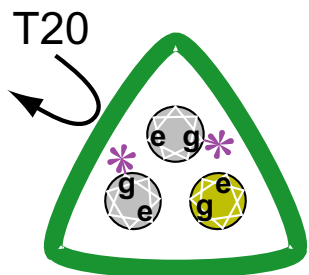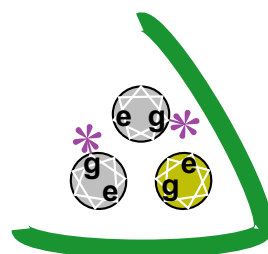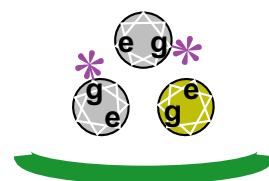

V529A

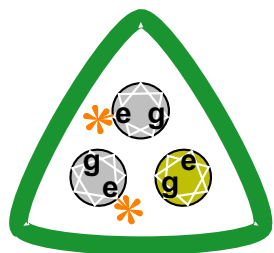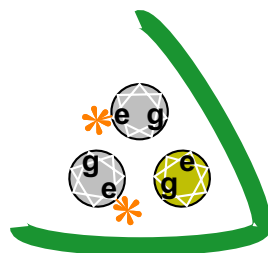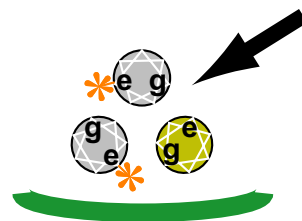

Supplement: ppat.1006098.s008.pdf [file ppat.1006098.s008.pdf]
